# Supplementary material for: Conundrum, an ARHGAP18 orthologue, regulates RhoA and proliferation through interactions with Moesin
Source: PubMed Central journal article supplement — Mol Biol Cell. 2013 May 1;24(9):1420–33. doi: 10.1091/mbc.E12-11-0800 (PMC3639053; doi:10.1091/mbc.e12-11-0800), 2013-05-01
Supplement: supp_E12-11-0800v1_CombinedSupMats.pdf [file supp_E12-11-0800v1_CombinedSupMats.pdf]

### **Figure S1. Moesin knockdown.**

(A). Moesin is strongly depleted by an RNAi transgene driven under the *engrailed-Gal4* driver in the posterior half of the wing imaginal disc. The boxed area indicates where Flag-Conu localization was analyzed in this same disc for Figure 2F.

### **Figure S2. Effects of Rho1 depletion and Rho Gap expression on the wing imaginal epithelium.**

(A) RNAi depletion of Rho1 in the dorsal compartment of the disc, under the *apGal4* driver, results in apoptosis, as assayed by Caspase-3 staining, and a smaller dorsal compartment. (B) Expression of a membrane tethered (myristoylated) version of a RhoGAP, *Cv-c*, under *apGal4* results in apoptosis and a smaller dorsal compartment as well. Membrane tethered expression of the C-terminal portion of Conu (residues 313-577) encompassing the GAP domain results in increased apical cell size in expressing cells (to the right of the arrowheads, C) and a furrow at the expression boundary, as can be seen from the bright E-cadherin staining where the two apical surfaces are opposed (D) and the lack of nuclei at the furrow (D'). The boundary of expression is indicated by arrowheads.

### **Figure S3. Interactions between Conu, Rho1 and Cdc42 in the eye.**

(A) Expression of untethered Flag-tagged *conu* has no effect on the adult eye when expressed under *GMR-Gal4*. (B-C) The untethered Conu protein has little if any ability to suppress the rough eye of *GMR>Rho1*. (D) *GMR-Cdc42*, *GMR-Gal4/+* expression has a slight rough eye. (E-G) Co-expression of *myr-conu*, *Myr-conu<sup>R402A</sup>*, or *myr-conu<sup>GAP</sup>* under the *GMR-Gal4* driver

along with *GMR-Cdc42* had no effect on the *Cdc42* eye phenotype, appearing similar to *myr-conu*, *myr-conu<sup>R402A</sup>* or *myr-conu<sup>GAP</sup>* alone (Fig. 8C, E, J).

#### **Figure S4. Effects of Arf6 expression in the eye.**

(A) Expression of *Arf6* in the posterior half of the disc under the *enGal4* driver results in cell shape changes compared to wild type cells (posterior is to the right of the arrowheads). (B-C) *Arf6* expression has no effect on Conu or phospho-ERM protein levels. (D-E) Co-expression of *Arf6* in the eye under *GMR-Gal4* alone with *GMR-Cdc42* had little effect on the adult eye, appearing similar to *GMR>Arf6* expression alone (Fig. 9H).

#### **Figure S5. Signaling Pathways and Conu**

For all discs, unless otherwise noted, staining of the disc proper is shown. The *enGal4* expressing, posterior half is to the right. A-B) *puc-LacZ*, a readout of JNK signaling is upregulated in cells expressing *myr-conu* compared to control discs. In contrast, readouts for Notch signaling (*E(Spl)Mb-LacZ*; C-D), Wingless signaling (*Dll* and *Sens*; E-H) Hippo signaling (Ex staining; I-J), Hedgehog signaling (*Ci* staining; K-K') are unaffected by *myr-Conu* expression. (L-L') Endogenous pattern of p-Mad staining, a TGFβ signaling readout, in wild-type wing discs. (M-M') p-Mad staining is not elevated in disc proper cells expressing *myr-conu*, but is increased in the overlying peripodial cells. Both layers express *myr-conu*.

A

*en>Flag-conu, UAS-MoeRNAi*

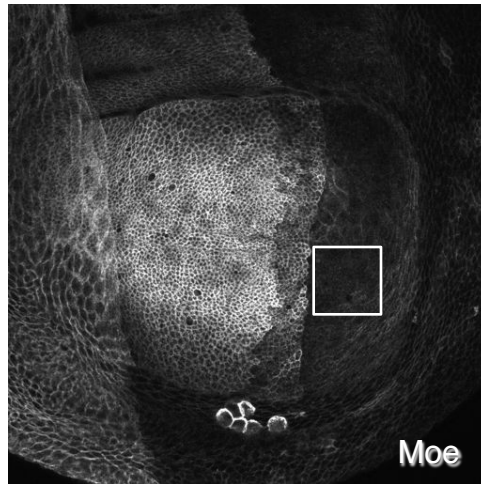

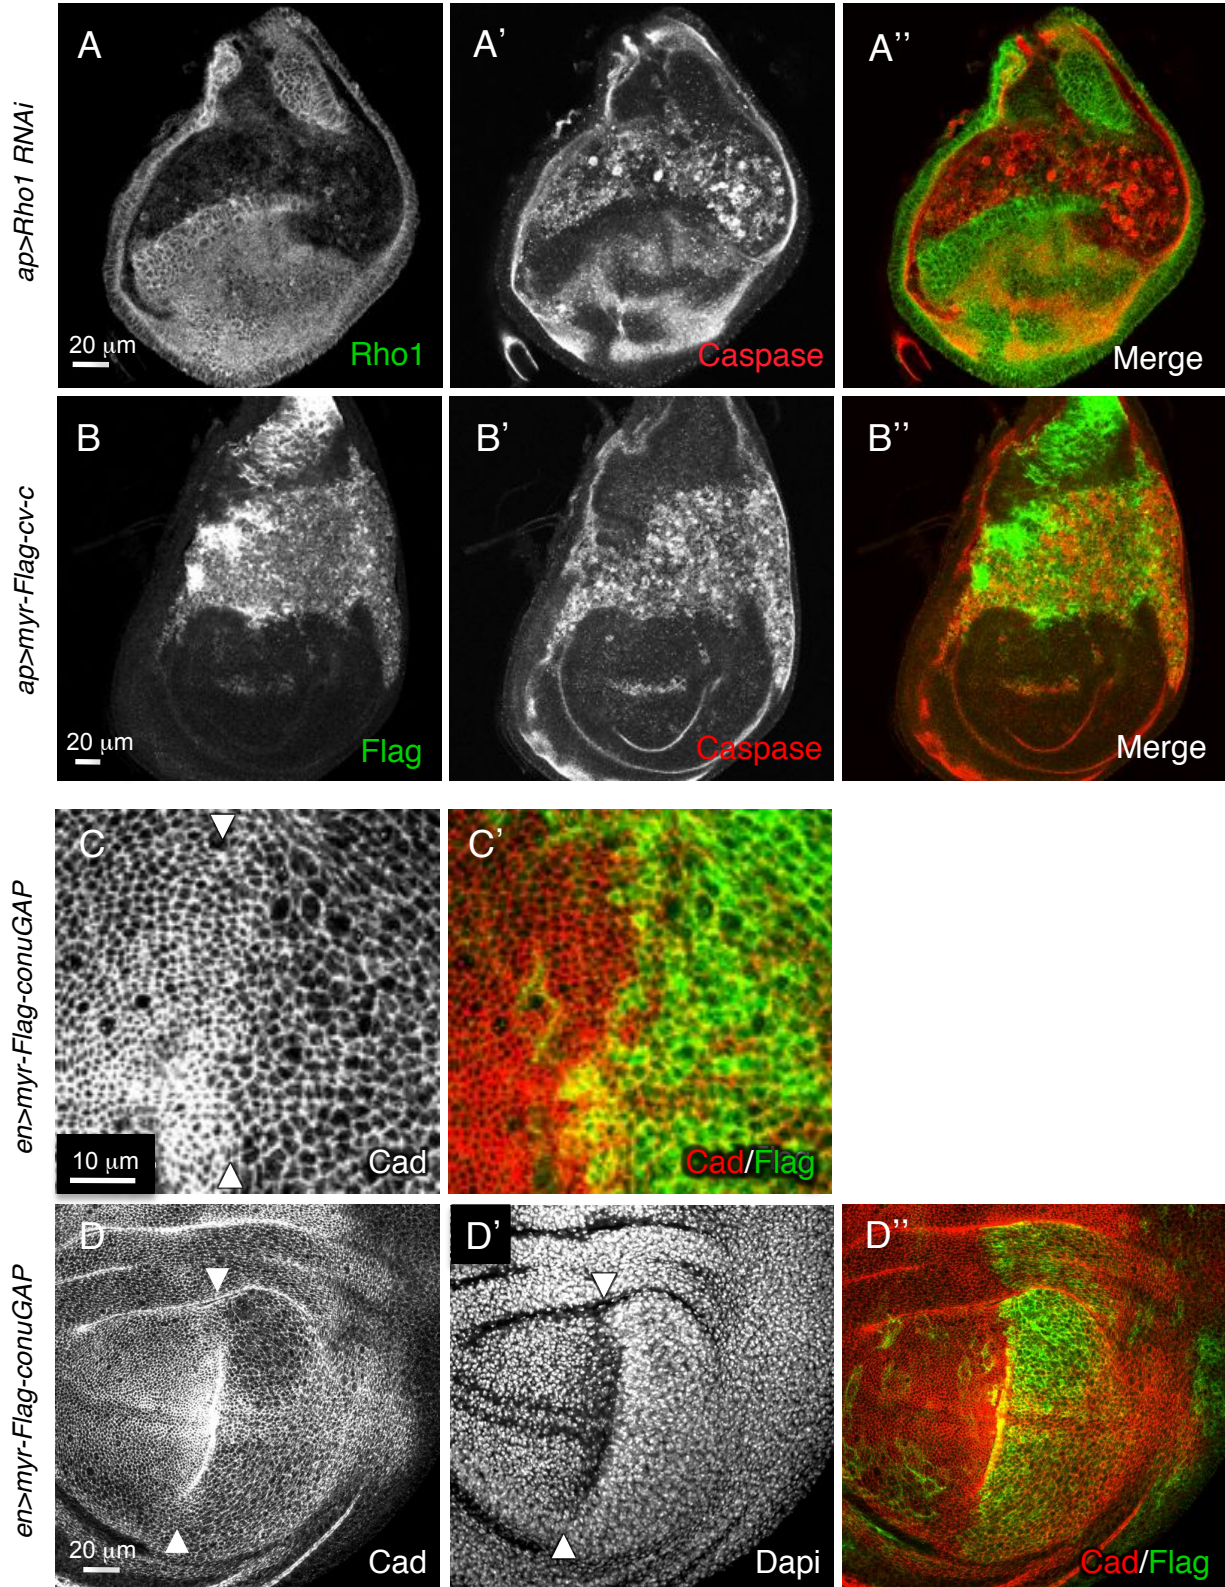

Neisch et al., Figure S2

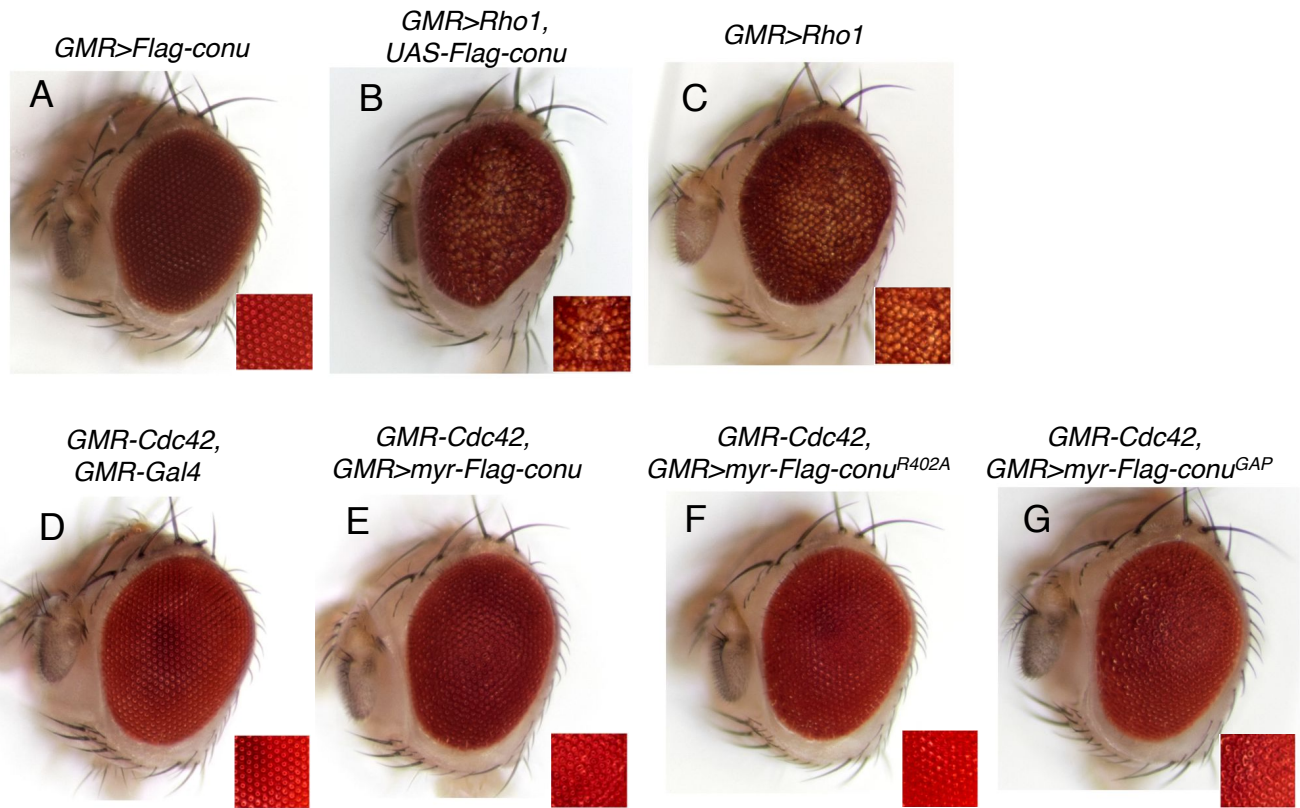

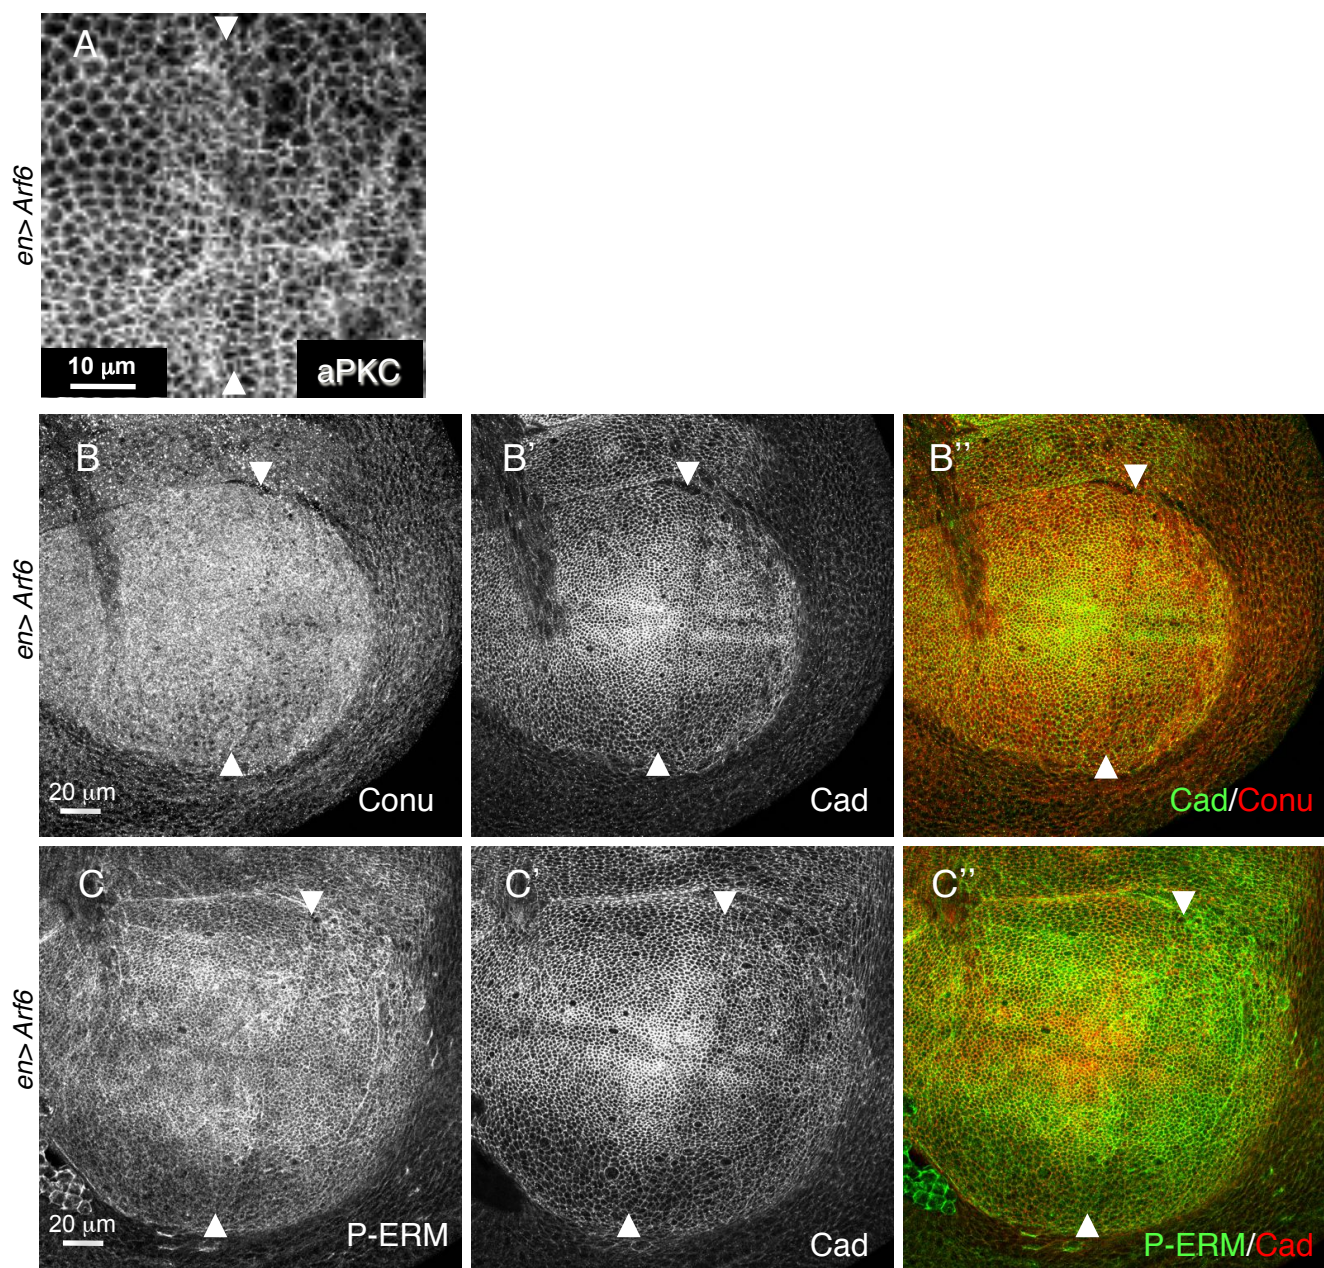

*GMR-Cdc42,*  
*GMRGal4*

*GMR-Cdc42,*  
*GMR>Arf6*

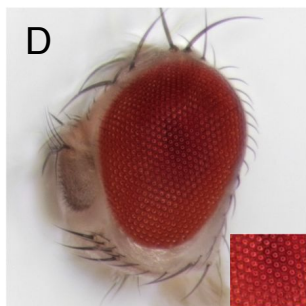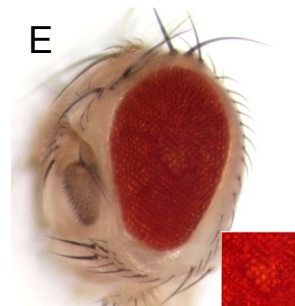

Neisch et al., Figure S4

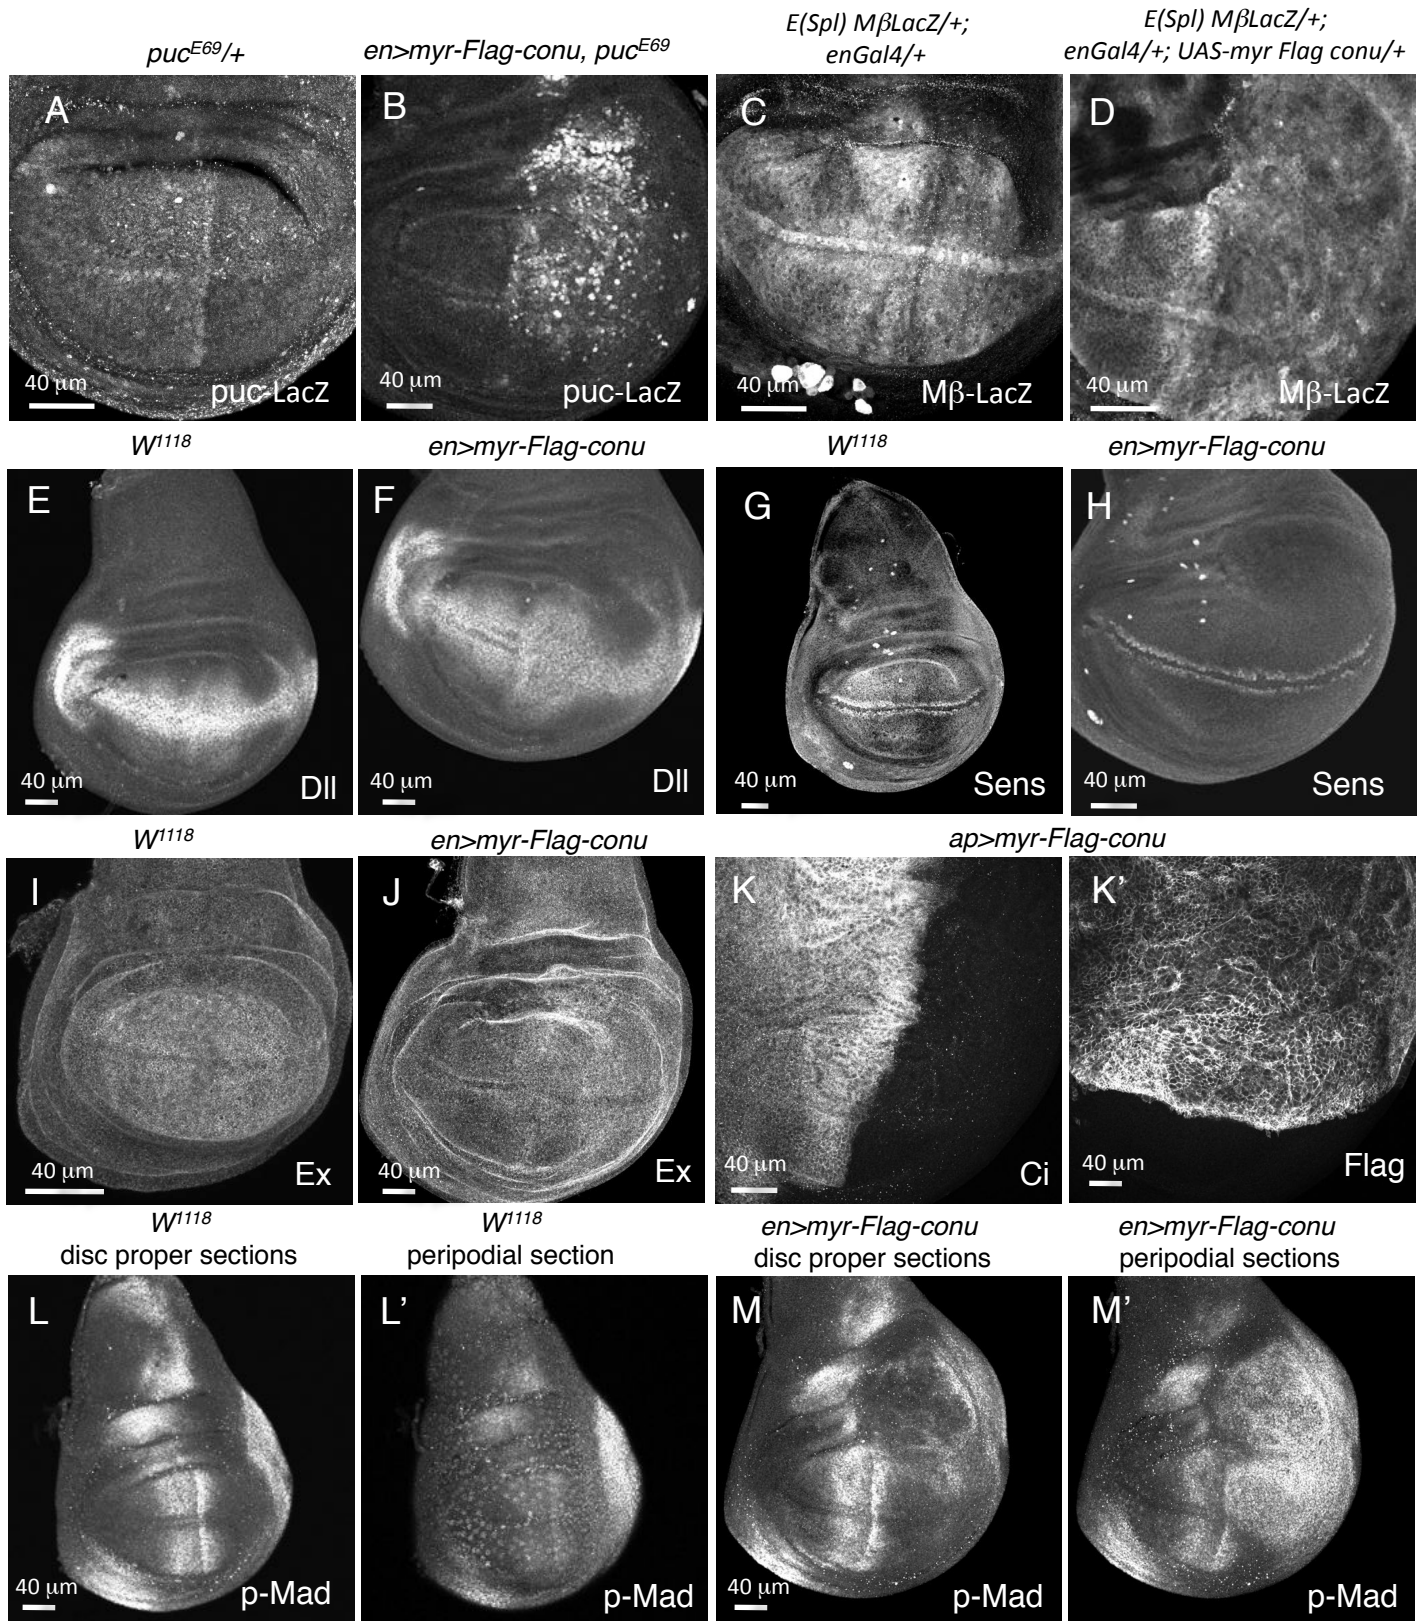

Neisch et al., Figure S5

A

*en>Flag-conu, UAS-MoeRNAi*

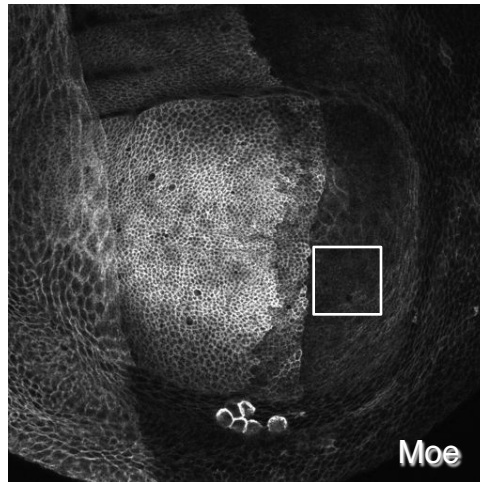



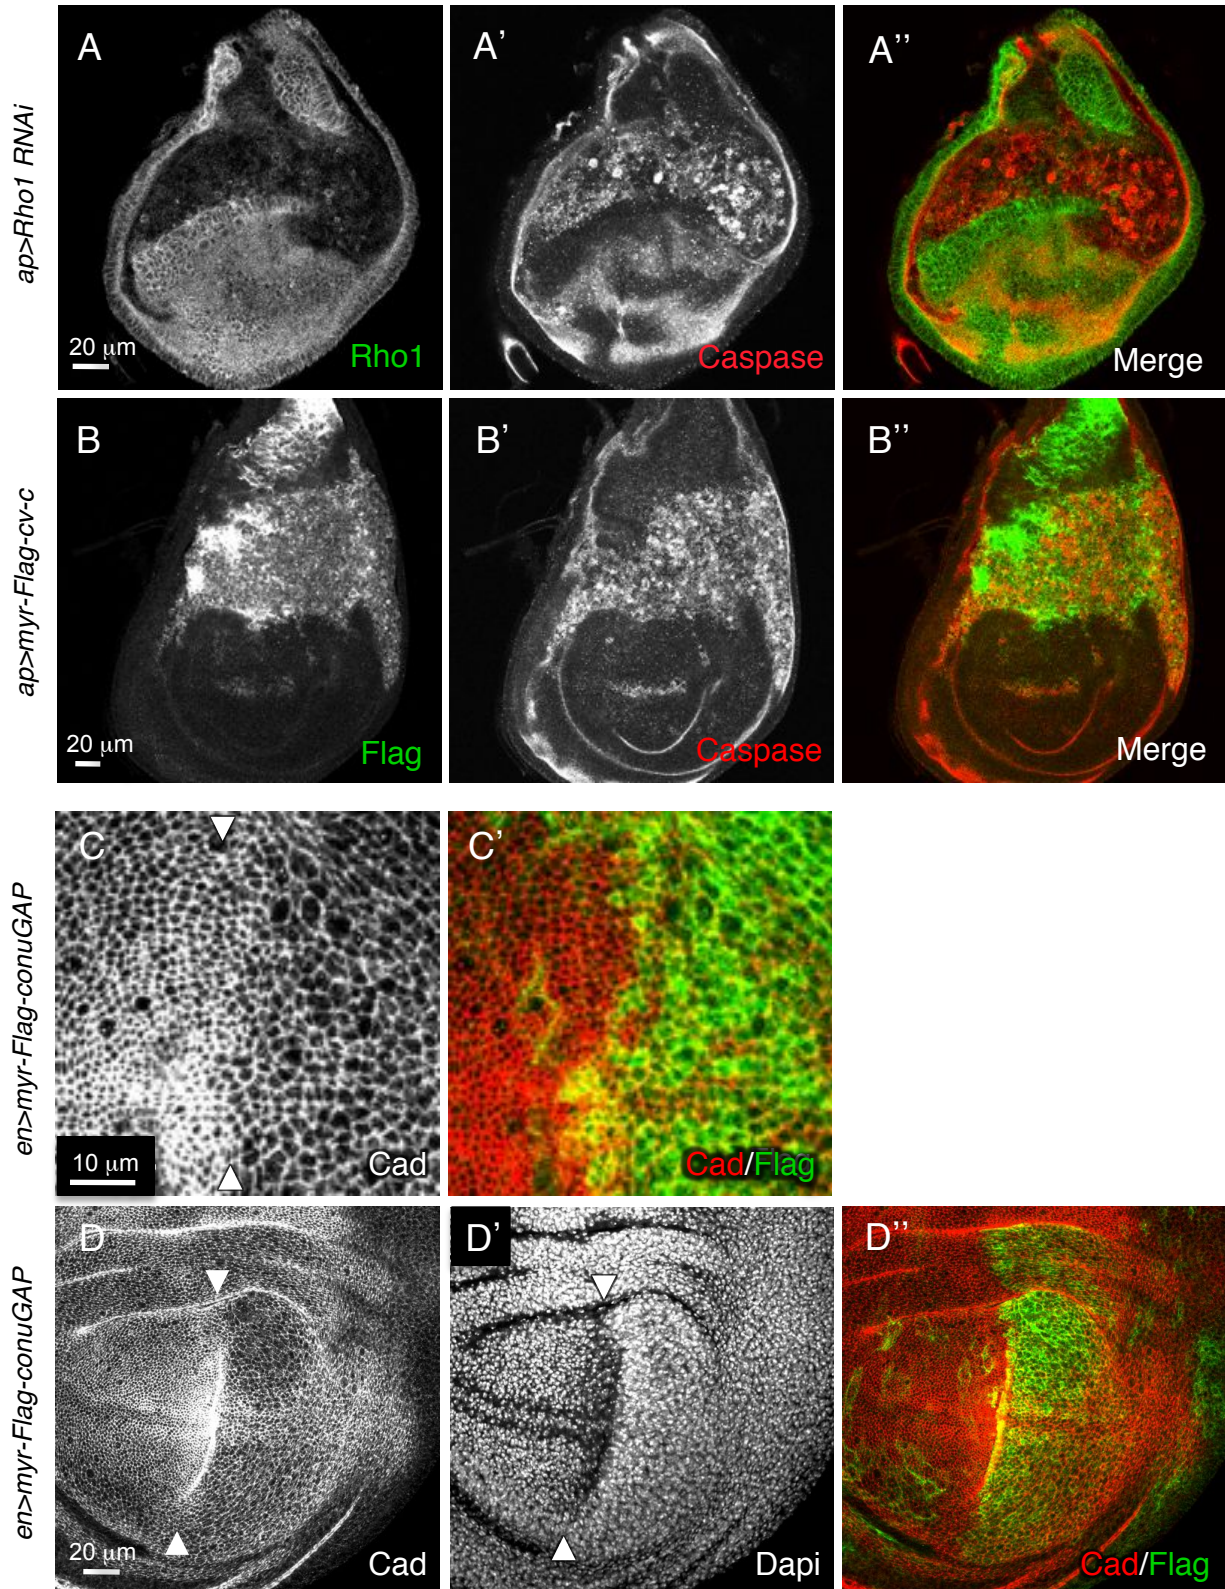

Neisch et al., Figure S2





*GMR-Cdc42,*  
*GMRGal4*

*GMR-Cdc42,*  
*GMR>Arf6*



Neisch et al., Figure S4



Neisch et al., Figure S5
